# Supplementary material
Source: PubMed Central journal article supplement (PMC7176403)
Supplement: NIHMS1057011-supplement-Supp_Figure_4.pdf [file NIHMS1057011-supplement-Supp_Figure_4.pdf]

# FIGURE S4

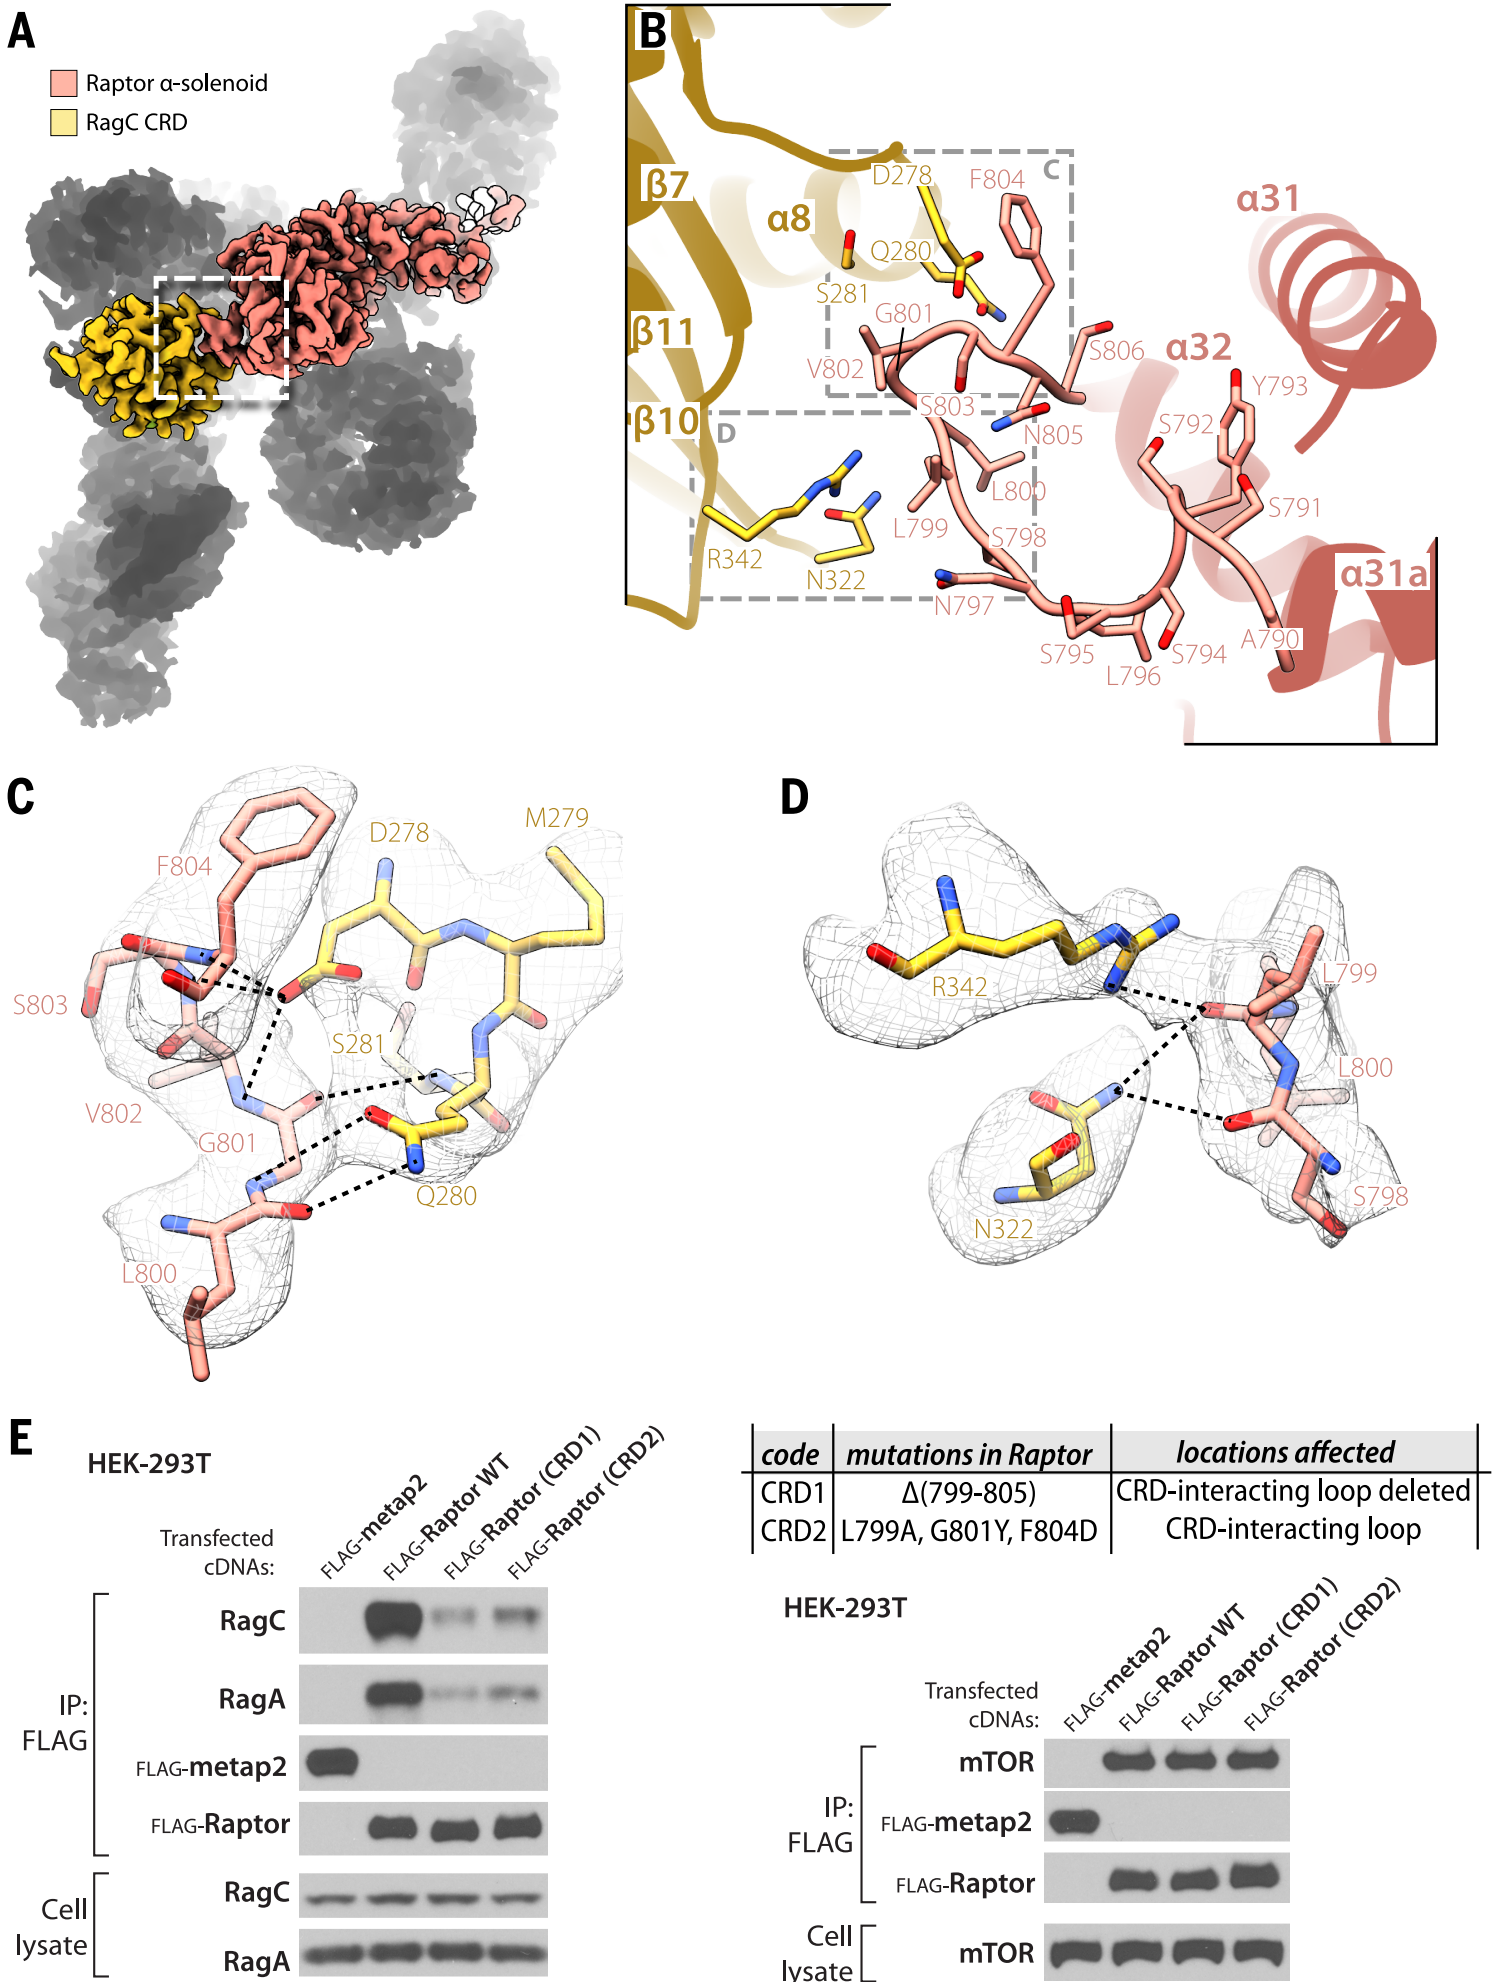

**Fig. S4. (A)** The binding interface between the Raptor  $\alpha$ -solenoid and RagC-CRD.

**(B)** Positioned at the very edge of the Raptor  $\alpha$ -solenoid, the  $\alpha$ 31a- $\alpha$ 32 loop (amino acids 790 to 806) engages with the CRD helix  $\alpha$ 8 (C), and the  $\beta$ 9- $\beta$ 10 and  $\beta$ 11- $\alpha$ 9 loops (D) of RagC.

**(C and D)** Close up views of the Raptor-RagC-CRD interactions. The interactions are driven largely by side-chain-to-backbone and backbone-to-backbone hydrogen bonding.

**(E)** A complete elimination of the Raptor  $\alpha$ 31a- $\alpha$ 32 loop or mutating key residues that drive the Raptor-RagC-CRD interaction (Table lists mutants made) decreases the ability of Raptor to co-immunoprecipitate the Rag GTPases (left panel) but not mTOR (right panel). Flag-metap2 was used as a negative control protein.
