# Supplementary material
Source: PubMed Central journal article supplement (PMC7176403)
Supplement: NIHMS1057011-supplement-Supp_Figure_6.pdf [file NIHMS1057011-supplement-Supp_Figure_6.pdf]

# FIGURE S6

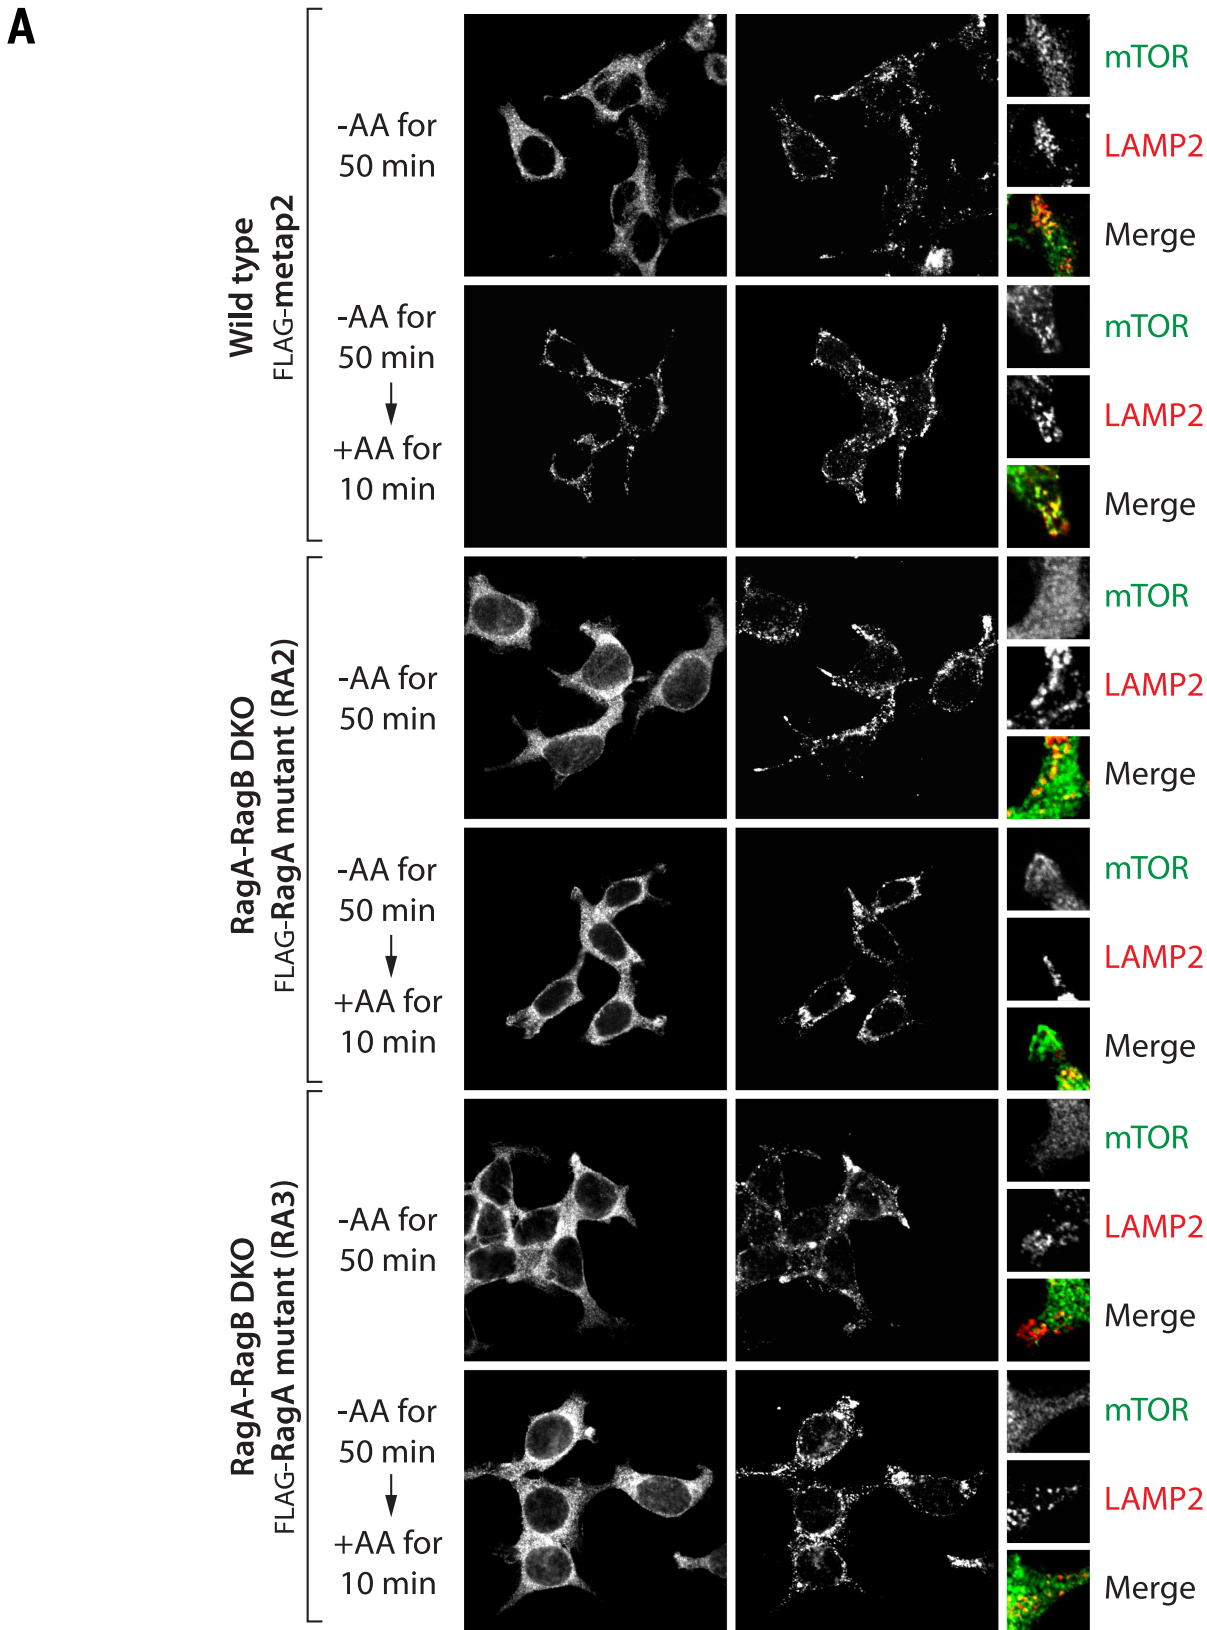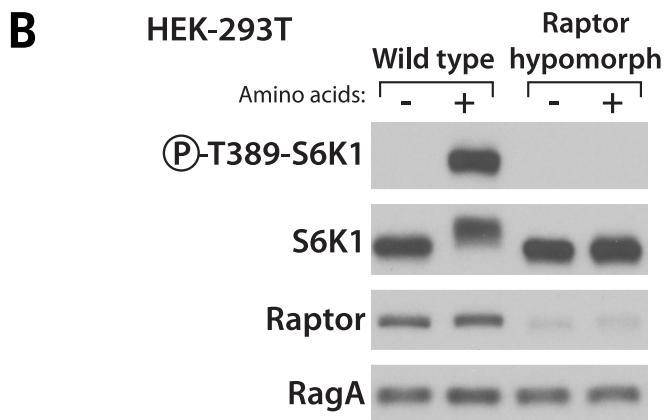

**Fig. S6. (A)** In cells lacking RagA and RagB, expression of the other two RagA mutants deficient in binding to Raptor, RA2 and RA3 (Fig. 2D), do not rescue the amino acid-induced co-localization of mTOR with lysosomes, as marked by the lysosomal protein LAMP2.

**(B)** The hypomorphic Raptor cell line generated with CRISPR-Cas9 gene editing shows a partial reduction in Raptor expression and sharp decrease in phospho-S6K1 signaling. Genomic DNA sequencing reveals that this cell line has no wild-type Raptor sequences but rather mutations in exon 13, which encodes a part of Raptor responsible for the recruitment of the mTORC1 substrates S6K1 and 4EBP1 (31). See methods for more details. the supercomplex on the lysosomal surface (44 nm radius).
