# Supplementary material
Source: PubMed Central journal article supplement (PMC7176403)
Supplement: NIHMS1057011-supplement-Supp_Figure_8.pdf [file NIHMS1057011-supplement-Supp_Figure_8.pdf]

## FIGURE S8

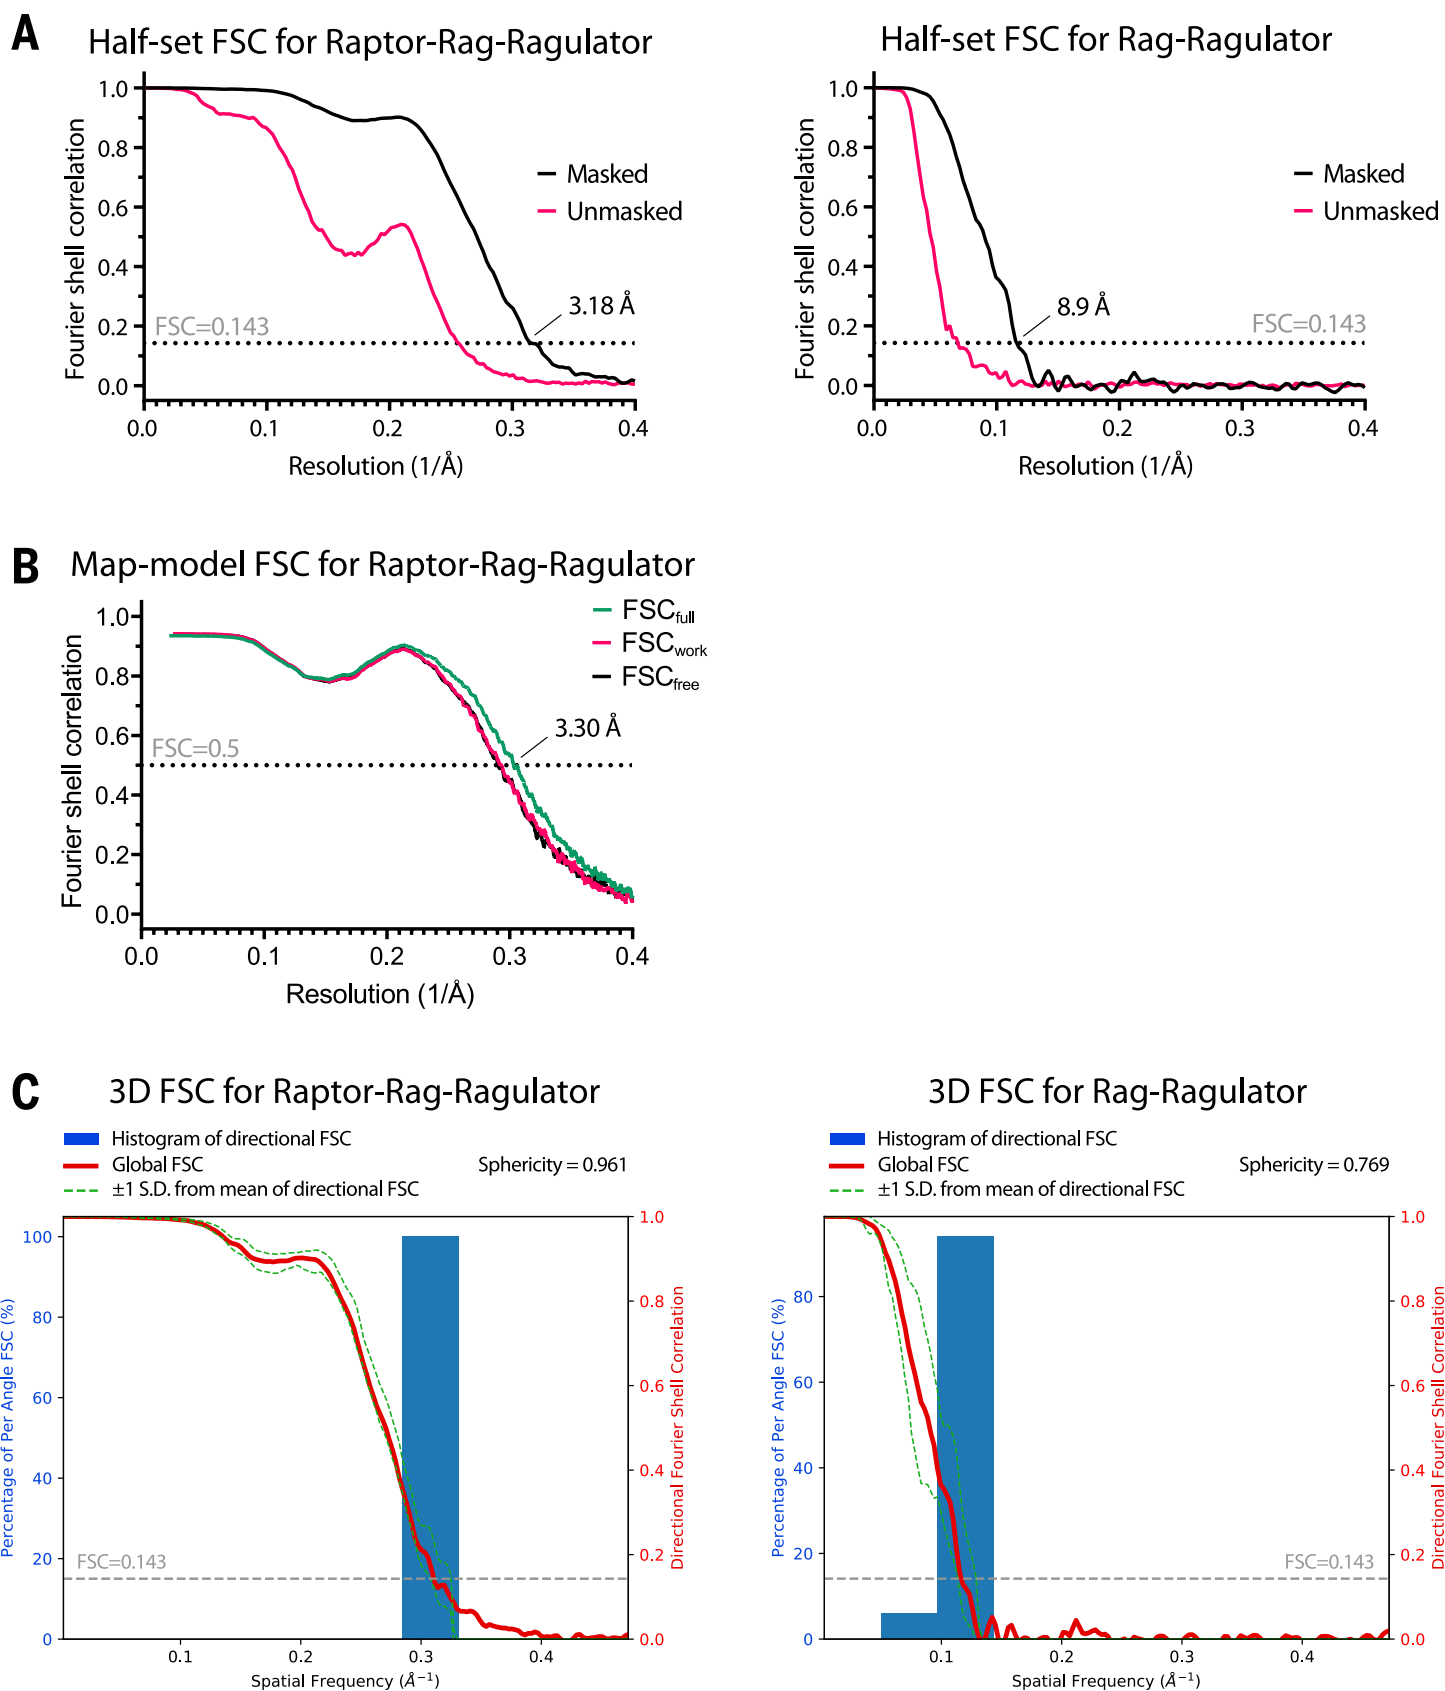

**Fig. S8. (A)** Fourier shell correlation (FSC) of two half maps before and after applying a mask.

**(B)** FSC of the molecular model versus three EM maps of the Raptor-Rag-Ragulator complex: (1) the combined map that the model was refined against (FSC<sub>full</sub>), (2) the first of two independent half-maps that the model was refined against to test potential overfitting during the model refinement procedure (FSC<sub>work</sub>), and (3) the second independent half-map (FSC<sub>free</sub>). FSC curves were calculated using phenix.mtriage (79).

**(C)** Directional resolution of the final cryo-EM maps of Raptor-Rag-Ragulator (left panel) and Rag-Ragulator (right panel). A very low standard deviation of directional FSC indicates a wide range of particle orientations in the sample, and high data quality.
