# Supplementary material
Source: PubMed Central journal article supplement (PMC7176403)
Supplement: NIHMS1057011-supplement-Supp_Figure_9.pdf [file NIHMS1057011-supplement-Supp_Figure_9.pdf]

# FIGURE S9

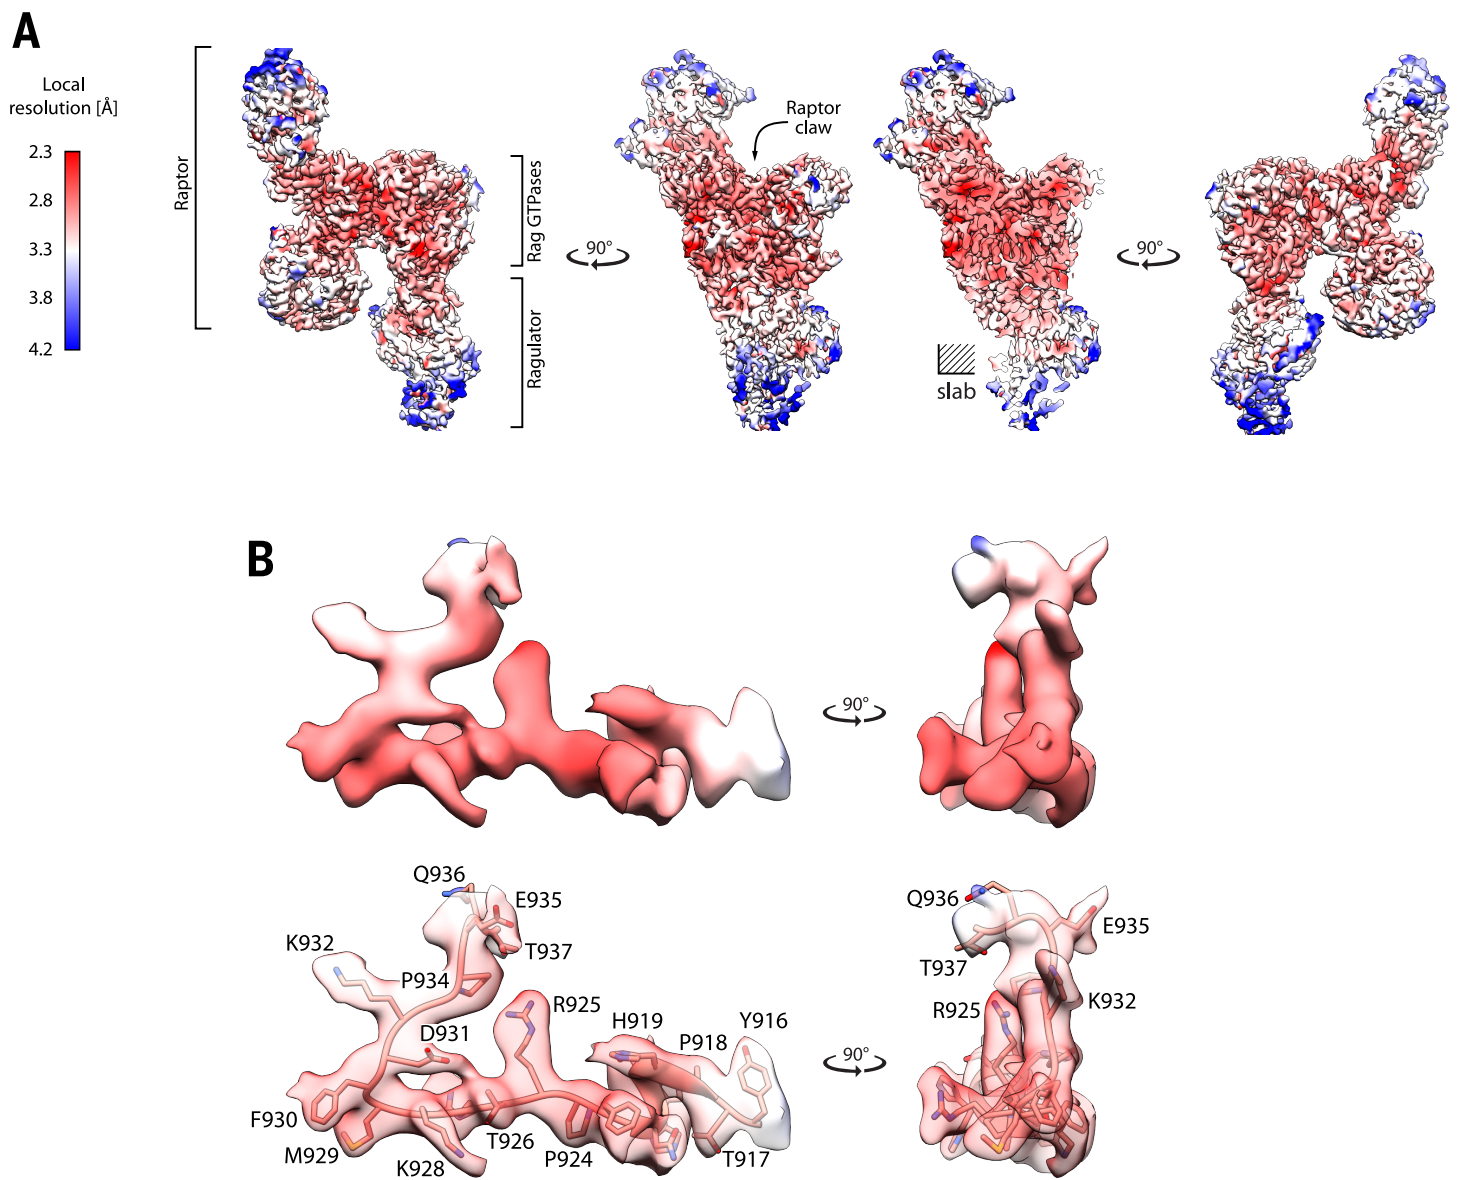

**Fig. S9. (A)** Estimation of local resolution of the Raptor-Rag-Ragulator map. The color scale from red to blue indicates the resolution range from 2.3 Å to 4.2 Å. Please note that the core of the supercomplex, where Raptor and Rag GTPases meet, is of the highest resolution, while the edges are more flexible. See Movie S2 for variability analysis.

**(B)** Close up views of the claw. The surface is colored with the same local resolution scale as in (A). Top – opaque views of the electron density. Bottom – transparent views of the electron density, with a molecular model built into it.
