# Supplementary material
Source: PubMed Central journal article supplement (PMC7176403)
Supplement: NIHMS1057011-supplement-Supp_Table_1.pdf [file NIHMS1057011-supplement-Supp_Table_1.pdf]

**TABLE S1**

| Addgene # | Plasmid                   | Cloning tier | Antibiotic resistance  | Replication origin | Recommended strain for propagation | Copy number | Expression host |
|-----------|---------------------------|--------------|------------------------|--------------------|------------------------------------|-------------|-----------------|
| 133070    | pFloat.T7_v1              | Tier 1       | kanamycin              | pBR322             | DB3.1                              | low         | bacteria        |
| 133071    | pFloat.cspA_v1            | Tier 1       | kanamycin              | pBR322             | DB3.1                              | high        | bacteria        |
| 133072    | pDarmo.CMVT_v1            | Tier 1       | ampicillin, gentamycin | pBR322             | DB3.1                              | high        | mammalian cells |
| 133083    | pFloat.assemble(AB).LC_v1 | Tier 1       | kanamycin              | pBR322             | DB3.1                              | low         | bacteria        |
| 133084    | pFloat.assemble(AB).HC_v1 | Tier 1       | kanamycin              | pBR322             | DB3.1                              | high        | bacteria        |

**Table S1.** Plasmids deposited on Addgene.
