# Supplementary material
Source: PubMed Central journal article supplement (PMC7176403)
Supplement: NIHMS1057011-supplement-Supp_Table_2.pdf [file NIHMS1057011-supplement-Supp_Table_2.pdf]

**TABLE S2**

|                                                 | Raptor-Rag-Ragulator           | Rag-Ragulator                  |
|-------------------------------------------------|--------------------------------|--------------------------------|
| <b>Imaging parameters and 3D reconstruction</b> |                                |                                |
| Cryo-EM grids                                   | Quantifoil R 1.2/1.3<br>Au 300 | Quantifoil R 1.2/1.3<br>Au 300 |
| Calibrated magnification                        | 47,259                         | 47,259                         |
| Accelerating voltage [kV]                       | 300                            | 300                            |
| Pixel size [Å] (super-resolution)               | 0.529                          | 0.529                          |
| Total dose [e <sup>-</sup> / Å <sup>2</sup> ]   | 42                             | 42                             |
| Exposure time [s]                               | 8                              | 8                              |
| Nominal defocus range [μm]                      | -1.0 to -3.5                   | -1.0 to -3.5                   |
| Particles in final 3D reconstruction            | 112,037                        | 14,186                         |
| Resolution ('Gold-standard' at FSC 0.143) [Å]   | 3.18                           | 8.67                           |
| <b>Model refinement</b>                         |                                |                                |
| Resolution in phenix.real_space_refine [Å]      | 3.30                           |                                |
| No. atoms: protein                              | 17043                          |                                |
| Ligands / ions                                  | GTP, GDP, Mg <sup>2+</sup>     |                                |
| Average B factors [Å <sup>2</sup> ]: protein    | 76.59                          |                                |
| Average B factors [Å <sup>2</sup> ]: ligand/ion | 19.10                          |                                |
| r.m.s. deviations: bond lengths [Å]             | 0.006                          |                                |
| r.m.s. deviations: bond angles [°]              | 0.914                          |                                |
| MolProbity score                                | 2.34                           |                                |
| EMRinger score                                  | 2.22                           |                                |
| Rotamers outliers [%]                           | 0.17                           |                                |
| Ramachandran angles: favored [%]                | 88.52                          |                                |
| Ramachandran angles: allowed [%]                | 11.48                          |                                |
| Ramachandran angles: outliers [%]               | 0                              |                                |
| EMDB accession code                             | EMD-20660                      | EMD-20661                      |
| PDB accession code                              | 6U62                           |                                |

**Table S2.** Summary of cryo-EM data collection, 3D reconstruction, and model refinement.
